# Supplementary material for: Dual regulatory roles of CO 2 on molecular sulfur dissolution in sour components of high-sulfur natural gas: insight from molecular dynamics simulations
Source: Royal Society of Chemistry journal article supplement (doi:10.1039/d5cp03139g), 2026-01-01
Supplement: d5cp03139g1.pdf [file d5cp03139g1.pdf]

## Supplementary Information

### Dual Regulatory Roles of CO<sub>2</sub> on Molecular Sulfur Dissolution in Sour Components of High-sulfur Natural Gas: Insight from Molecular Dynamics Simulations

Shuangli Yue,<sup>a, b</sup> Nong Li,<sup>a</sup> Li Wang<sup>a, \*</sup>, Ying Wan,<sup>a</sup> Chengxin He,<sup>c</sup> Li Zhang,<sup>b, \*</sup> Mingli Yang<sup>b</sup>

<sup>a</sup> Research Institute of Exploration and Development, PetroChina Southwest Oil and Gasfield Company, Chengdu 610213, China

<sup>b</sup> Institute of Atomic and Molecular Physics, Sichuan University, Chengdu 610065, China

<sup>c</sup> Suzhou Laboratory, Suzhou 215123, China

---

\* Corresponding authors

E-mail addresses: wangli2022222@sina.com (Li Wang), lizhang@scu.edu.cn (Li Zhang)

## 1. CO<sub>2</sub>–H<sub>2</sub>S Association Model

An association model can be suggested to elucidate the intermolecular interaction in the system. It is assumed that CO<sub>2</sub> reversibly associates with H<sub>2</sub>S to form a complex of H<sub>2</sub>S(CO<sub>2</sub>)<sub>n</sub>, represented by

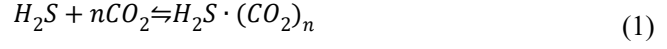

where n denotes the coordination number of CO<sub>2</sub> in the complex. The equilibrium constant K is defined as

$$K = \frac{H_2S \cdot (CO_2)_n}{H_2S \cdot CO_2^n} \quad (2)$$

The solubility (S) in the mixed system is then expressed as

$$S = S_0 \times [H_2S] + S_1 \times CO_2 \quad (3)$$

where S<sub>0</sub> is the solubility of elemental sulfur in pure H<sub>2</sub>S, which is 13.93 mmol/mol. The solubility of S<sub>8</sub> in pure CO<sub>2</sub> was also calculated and is referred to as S<sub>1</sub>, with a value of 1.84 mmol/mol. Based on this association model, the coordination number n was determined by fitting the simulation S<sub>8</sub> solubility data using a nonlinear least-squares method, in which n was optimized by minimizing the squared deviation between the model prediction and the simulation results. The fitted value n = 0.62 indicates that although CO<sub>2</sub> does not form a strong or stable complex with H<sub>2</sub>S, a weak local association still exists. CO<sub>2</sub> molecules partially occupy the solvation environment around H<sub>2</sub>S, thereby weakening its solvation interaction with S<sub>8</sub> and reducing S<sub>8</sub> solubility. This result indicates that, as CO<sub>2</sub> is gradually introduced into a pure H<sub>2</sub>S system, the solubility of S<sub>8</sub> does not follow a simple additive trend of the two solvents, instead, the interactions between CO<sub>2</sub> and H<sub>2</sub>S must be fully considered. Furthermore, this finding is consistent with the corrected PRDF analysis in Fig. 4, where increasing CO<sub>2</sub> concentration leads to a notable decline in the local density of S<sub>8</sub>–H<sub>2</sub>S pairs, while enhancing the presence of H<sub>2</sub>S–CO<sub>2</sub> and S<sub>8</sub>–CO<sub>2</sub> pairs. These observations support the assumptions of the association model at the microscopic level

## 2. Force-Field Validation

To evaluate the impact of force-field models and combining-rule choices on the calculated results, the H<sub>2</sub>S–CO<sub>2</sub> system was taken as a representative case. Comparative tests were performed using coarse-grained<sup>1,2</sup> and all-atom<sup>3,4</sup> force fields, in combination with the Lorentz–Berthelot (LB) mixing rule and the geometric mixing rule. The corresponding force-field parameters are provided in Tables S1 and S2. In the Lorentz–Berthelot mixing rule, the cross Lennard–Jones parameters are defined as

$$\epsilon_{ij} = \sqrt{\epsilon_i \epsilon_j} \quad (4)$$

$$\sigma_{ij} = \frac{1}{2}(\sigma_i + \sigma_j) \quad (5)$$

whereas in the geometric mixing rule they are given by,

$$\epsilon_{ij} = \sqrt{\epsilon_i \epsilon_j} \quad (6)$$

$$\sigma_{ij} = \sqrt{\sigma_i \sigma_j} \quad (7)$$

Consistent trends are observed for different combining rules and force field models, with all deviations within acceptable statistical uncertainty, as illustrated in Fig. S4. Such benchmark calculations indicate that the computational strategies in this work are adequate to produce reliable results for addressing the solubility evolution mechanism of elementary sulfur in the mixed gases.

**Table S1** The coarse-grained force-field parameters used in this work<sup>1,2</sup>

|                  | $\epsilon$ (kcal/mol) | $\sigma$ (Å) | charge |
|------------------|-----------------------|--------------|--------|
| H <sub>2</sub> S | 0.563                 | 3.667        | 0      |
| CO <sub>2</sub>  | 0.459                 | 3.627        | 0      |
| CH <sub>4</sub>  | 0.294                 | 3.730        | 0      |

**Table S2** The all-atom force-field parameters for CO<sub>2</sub> and H<sub>2</sub>S used in this work<sup>3,4</sup>

| Aom pair    | $\epsilon$ (kcal/mol)        | $\sigma$ (Å) | charge     |
|-------------|------------------------------|--------------|------------|
| S           | 0.497                        | 3.720        | -0.2480    |
| H           | 0.008                        | 0.980        | 0.1240     |
| C           | 0.056                        | 2.800        | 0.6512     |
| O           | 0.160                        | 3.028        | -0.3256    |
| Bond coeff  | K (kcal/mol Å <sup>2</sup> ) |              | $r_0$ (Å)  |
| S-H         | 95.805                       |              | 1.365      |
| C-O         | 1008.963                     |              | 1.162      |
| Angle coeff | K (kcal/mol)                 |              | $\theta_0$ |
| H-S-H       | 62.050                       |              | 91.500     |
| O-C-O       | 54.003                       |              | 180.000    |

**Table S3** Comparison of density between MD simulation and PR-EOS at 393.15 K and 40 MPa under different CO<sub>2</sub> counts in H<sub>2</sub>S–CO<sub>2</sub> binary solvent systems.

| Numbers of<br>S <sub>8</sub> | Numbers of<br>H <sub>2</sub> S | Numbers of<br>CO <sub>2</sub> | $\rho$ (g/m <sup>3</sup> ) |        | $\Delta\rho$<br>(g/m <sup>3</sup> ) |
|------------------------------|--------------------------------|-------------------------------|----------------------------|--------|-------------------------------------|
|                              |                                |                               | MD simulation              | PR-EOS |                                     |
| 1,000                        | 20,000                         | 0                             | 0.836                      | 0.913  | 0.077                               |
|                              |                                | 500                           | 0.834                      | 0.910  | 0.076                               |
|                              |                                | 1,000                         | 0.830                      | 0.908  | 0.078                               |
|                              |                                | 1,500                         | 0.829                      | 0.905  | 0.076                               |
|                              |                                | 2,000                         | 0.825                      | 0.902  | 0.077                               |
|                              |                                | 2,500                         | 0.822                      | 0.900  | 0.078                               |
|                              |                                | 5,000                         | 0.812                      | 0.887  | 0.075                               |
|                              |                                | 10,000                        | 0.793                      | 0.866  | 0.073                               |
|                              |                                | 15,000                        | 0.780                      | 0.846  | 0.066                               |
|                              |                                | 20,000                        | 0.770                      | 0.831  | 0.061                               |
|                              |                                | 25,000                        | 0.762                      | 0.817  | 0.055                               |
|                              |                                | 30,000                        | 0.756                      | 0.806  | 0.050                               |
|                              |                                | 35,000                        | 0.751                      | 0.796  | 0.045                               |
|                              |                                | 40,000                        | 0.746                      | 0.787  | 0.041                               |
|                              |                                | 45,000                        | 0.744                      | 0.780  | 0.036                               |
|                              |                                | 50,000                        | 0.741                      | 0.774  | 0.033                               |

**Table S4** Comparison of density between MD simulation and PR-EOS at 393.15 K and 40 MPa under different CO<sub>2</sub> counts in H<sub>2</sub>S–CH<sub>4</sub>–CO<sub>2</sub> ternary solvent systems (1:4).

| Numbers of<br>S <sub>8</sub> | Numbers of<br>H <sub>2</sub> S | Numbers of<br>CH <sub>4</sub> | Numbers of<br>CO <sub>2</sub> | $\rho$ (g/m <sup>3</sup> ) |            | $\Delta\rho$<br>(g/m <sup>3</sup> ) |
|------------------------------|--------------------------------|-------------------------------|-------------------------------|----------------------------|------------|-------------------------------------|
|                              |                                |                               |                               | MD<br>simulation           | PR-<br>EOS |                                     |
| 500                          | 10,000                         | 40,000                        | 0                             | 0.263                      | 0.286      | 0.023                               |
|                              |                                |                               | 1,000                         | 0.269                      | 0.291      | 0.022                               |
|                              |                                |                               | 2,000                         | 0.275                      | 0.298      | 0.023                               |
|                              |                                |                               | 3,000                         | 0.281                      | 0.304      | 0.023                               |
|                              |                                |                               | 4,000                         | 0.288                      | 0.310      | 0.022                               |
|                              |                                |                               | 5,000                         | 0.293                      | 0.315      | 0.022                               |
|                              |                                |                               | 10,000                        | 0.319                      | 0.341      | 0.022                               |
|                              |                                |                               | 15,000                        | 0.341                      | 0.364      | 0.023                               |
|                              |                                |                               | 20,000                        | 0.361                      | 0.384      | 0.023                               |
|                              |                                |                               | 25,000                        | 0.379                      | 0.401      | 0.022                               |
|                              |                                |                               | 30,000                        | 0.395                      | 0.417      | 0.022                               |
|                              |                                |                               | 35,000                        | 0.410                      | 0.431      | 0.021                               |
|                              |                                |                               | 40,000                        | 0.423                      | 0.444      | 0.021                               |
|                              |                                |                               | 45,000                        | 0.435                      | 0.455      | 0.020                               |
|                              |                                |                               | 50,000                        | 0.446                      | 0.465      | 0.019                               |

**Table S5** Comparison of density between MD simulation and PR-EOS at 393.15 K and 40 MPa under different CO<sub>2</sub> counts in H<sub>2</sub>S–CH<sub>4</sub>–CO<sub>2</sub> ternary solvent systems (1:6).

| Numbers of<br>S <sub>8</sub> | Numbers of<br>H <sub>2</sub> S | Numbers of<br>CH <sub>4</sub> | Numbers of<br>CO <sub>2</sub> | $\rho$ (g/m <sup>3</sup> ) |            | $\Delta\rho$<br>(g/m <sup>3</sup> ) |
|------------------------------|--------------------------------|-------------------------------|-------------------------------|----------------------------|------------|-------------------------------------|
|                              |                                |                               |                               | MD<br>simulation           | PR-<br>EOS |                                     |
| 500                          | 10,000                         | 60,000                        | 0                             | 0.237                      | 0.255      | 0.018                               |
|                              |                                |                               | 5,000                         | 0.260                      | 0.278      | 0.018                               |
|                              |                                |                               | 10,000                        | 0.279                      | 0.298      | 0.019                               |
|                              |                                |                               | 15,000                        | 0.298                      | 0.317      | 0.019                               |
|                              |                                |                               | 20,000                        | 0.315                      | 0.334      | 0.019                               |
|                              |                                |                               | 25,000                        | 0.331                      | 0.349      | 0.018                               |
|                              |                                |                               | 30,000                        | 0.345                      | 0.363      | 0.018                               |
|                              |                                |                               | 35,000                        | 0.358                      | 0.376      | 0.018                               |
|                              |                                |                               | 40,000                        | 0.370                      | 0.388      | 0.018                               |
|                              |                                |                               | 45,000                        | 0.381                      | 0.399      | 0.018                               |
|                              |                                |                               | 50,000                        | 0.392                      | 0.410      | 0.018                               |

**Table S6** Solubility of S<sub>8</sub> and number of aggregated S<sub>8</sub> molecules under different CO<sub>2</sub> counts in H<sub>2</sub>S–CO<sub>2</sub> binary solvent systems. N = number of independent MD trajectories used for uncertainty estimation.

| Numbers of S <sub>8</sub> | Numbers of H <sub>2</sub> S | Numbers of CO <sub>2</sub> | S (mmol/mol) | Number of aggregated S <sub>8</sub> molecules | N |
|---------------------------|-----------------------------|----------------------------|--------------|-----------------------------------------------|---|
| 1,000                     | 20,000                      | 0                          | 13.63±0.093  | 727.40±1.860                                  | 3 |
|                           |                             | 500                        | 12.69±0.083  | 739.86±1.702                                  | 3 |
|                           |                             | 1,000                      | 12.34±0.003  | 740.86±0.063                                  | 3 |
|                           |                             | 1,500                      | 12.18±0.170  | 738.13±3.655                                  | 3 |
|                           |                             | 2,000                      | 11.86±0.052  | 739.08±1.144                                  | 3 |
|                           |                             | 2,500                      | 10.85±0.022  | 755.88±0.495                                  | 3 |
|                           |                             | 5,000                      | 7.98±0.155   | 800.63±3.875                                  | 3 |
|                           |                             | 10,000                     | 5.90±0.125   | 823.15±3.750                                  | 3 |
|                           |                             | 15,000                     | 3.86±0.055   | 865.08±1.925                                  | 3 |
|                           |                             | 20,000                     | 3.36±0.010   | 865.60±0.400                                  | 3 |
|                           |                             | 25,000                     | 2.91±0.045   | 869.28±2.025                                  | 3 |
|                           |                             | 30,000                     | 2.75±0.005   | 862.75±0.250                                  | 3 |
|                           |                             | 35,000                     | 2.47±0.070   | 864.15±3.850                                  | 3 |
|                           |                             | 40,000                     | 2.27±0.015   | 864.10±0.900                                  | 3 |
|                           |                             | 45,000                     | 2.02±0.050   | 868.70±3.250                                  | 3 |
|                           |                             | 50,000                     | 1.90±0.010   | 867.00±0.700                                  | 3 |

**Table S7** Solubility of S<sub>8</sub> and number of aggregated S<sub>8</sub> molecules under different CO<sub>2</sub> counts in H<sub>2</sub>S–CH<sub>4</sub>–CO<sub>2</sub> ternary solvent systems (1:4). N = number of independent MD trajectories used for uncertainty estimation.

| Numbers<br>of S <sub>8</sub> | Numbers<br>of H <sub>2</sub> S | Numbers<br>of CH <sub>4</sub> | Numbers<br>of CO <sub>2</sub> | S (mmol/mol) | Number of<br>aggregated S <sub>8</sub><br>molecules | N |
|------------------------------|--------------------------------|-------------------------------|-------------------------------|--------------|-----------------------------------------------------|---|
| 500                          | 10,000                         | 40,000                        | 0                             | 0.33 ± 0.007 | 483.50 ± 0.350                                      | 3 |
|                              |                                |                               | 1,000                         | 0.31 ± 0.009 | 484.04 ± 0.459                                      | 3 |
|                              |                                |                               | 2,000                         | 0.32 ± 0.017 | 483.41 ± 0.884                                      | 3 |
|                              |                                |                               | 3,000                         | 0.31 ± 0.012 | 483.52 ± 0.636                                      | 3 |
|                              |                                |                               | 4,000                         | 0.32 ± 0.005 | 482.56 ± 0.270                                      | 3 |
|                              |                                |                               | 5,000                         | 0.32 ± 0.013 | 482.46 ± 0.715                                      | 3 |
|                              |                                |                               | 10,000                        | 0.32 ± 0.002 | 480.80 ± 0.120                                      | 3 |
|                              |                                |                               | 15,000                        | 0.33 ± 0.006 | 478.88 ± 0.390                                      | 3 |
|                              |                                |                               | 20,000                        | 0.33 ± 0.007 | 476.62 ± 0.490                                      | 3 |
|                              |                                |                               | 25,000                        | 0.35 ± 0.003 | 473.68 ± 0.225                                      | 3 |
|                              |                                |                               | 30,000                        | 0.35 ± 0.005 | 471.84 ± 0.400                                      | 3 |
|                              |                                |                               | 35,000                        | 0.36 ± 0.013 | 469.15 ± 1.105                                      | 3 |
|                              |                                |                               | 40,000                        | 0.43 ± 0.012 | 461.48 ± 1.080                                      | 3 |
|                              |                                |                               | 45,000                        | 0.44 ± 0.016 | 458.30 ± 1.520                                      | 3 |
|                              |                                |                               | 50,000                        | 0.45 ± 0.012 | 455.30 ± 1.200                                      | 3 |



**Table S8** Solubility of S<sub>8</sub> and number of aggregated S<sub>8</sub> molecules under different CO<sub>2</sub> counts in H<sub>2</sub>S–CH<sub>4</sub>–CO<sub>2</sub> ternary solvent systems (1:6). N = number of independent MD trajectories used for uncertainty estimation.

| Numbers<br>of S <sub>8</sub> | Numbers<br>of H <sub>2</sub> S | Numbers<br>of CH <sub>4</sub> | Numbers<br>of CO <sub>2</sub> | S (mmol/mol)  | Number of<br>aggregated S <sub>8</sub><br>molecules | N |
|------------------------------|--------------------------------|-------------------------------|-------------------------------|---------------|-----------------------------------------------------|---|
| 500                          | 10,000                         | 40,000                        | 0                             | 0.233 ± 0.003 | 483.69 ± 0.210                                      | 3 |
|                              |                                |                               | 5,000                         | 0.235 ± 0.011 | 482.38 ± 0.825                                      | 3 |
|                              |                                |                               | 10,000                        | 0.252 ± 0.012 | 479.84 ± 0.960                                      | 3 |
|                              |                                |                               | 15,000                        | 0.267 ± 0.001 | 477.31 ± 0.085                                      | 3 |
|                              |                                |                               | 20,000                        | 0.269 ± 0.008 | 475.79 ± 0.720                                      | 3 |
|                              |                                |                               | 25,000                        | 0.281 ± 0.005 | 473.31 ± 0.475                                      | 3 |
|                              |                                |                               | 30,000                        | 0.299 ± 0.014 | 470.10 ± 1.400                                      | 3 |
|                              |                                |                               | 35,000                        | 0.309 ± 0.002 | 467.56 ± 0.210                                      | 3 |
|                              |                                |                               | 40,000                        | 0.315 ± 0.008 | 465.35 ± 0.880                                      | 3 |
|                              |                                |                               | 45,000                        | 0.346 ± 0.002 | 460.21 ± 0.230                                      | 3 |
|                              |                                |                               | 50,000                        | 0.388 ± 0.008 | 453.44 ± 0.960                                      | 3 |

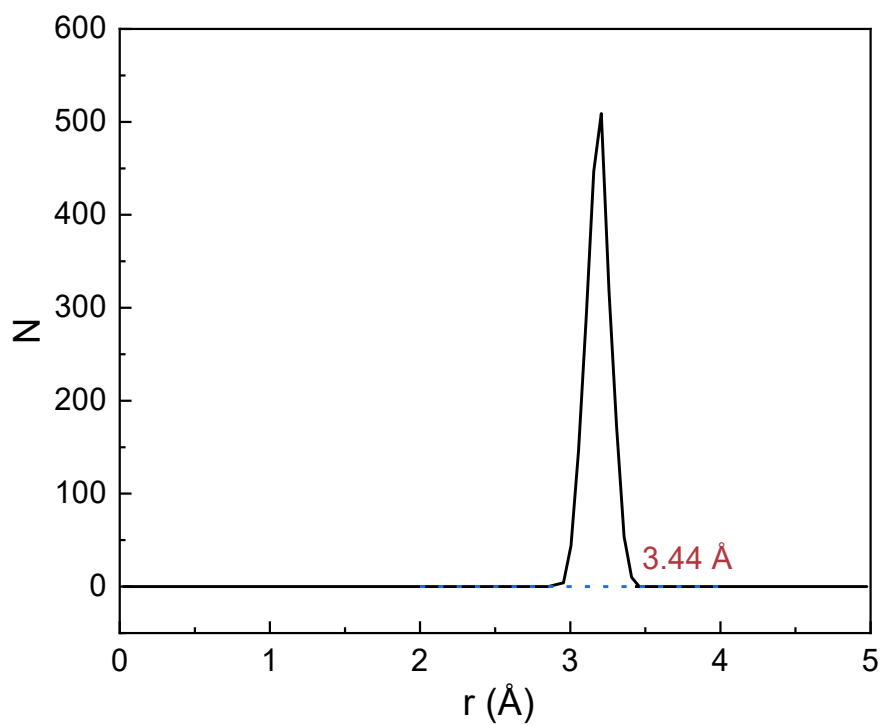

**Fig. S1** The shortest intermolecular distances between neighboring  $S_8$  molecules in the pure  $S_8$  system

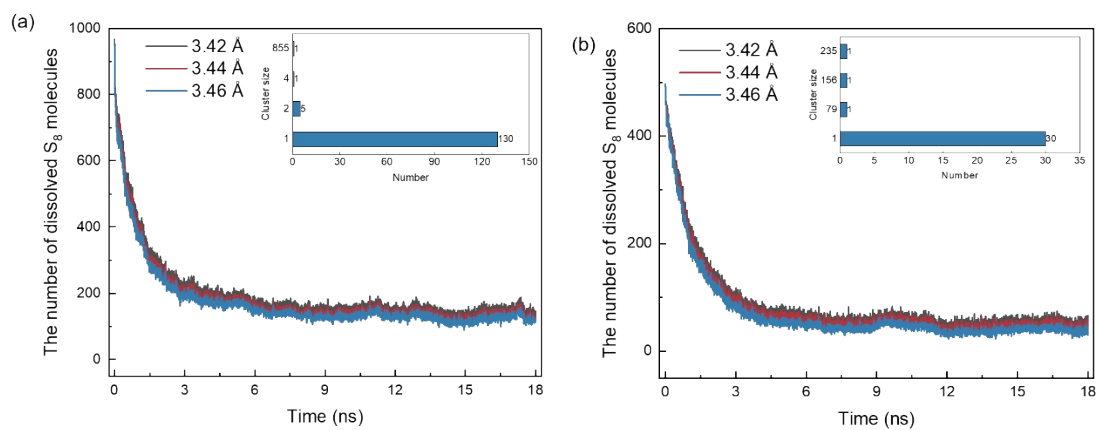

**Fig. S2** Sensitivity of  $S_8$  cluster identification to the cutoff distance and the corresponding cluster-size distributions. (a)  $H_2S-CO_2$  system and (b)  $H_2S-CO_2-CH_4$  system, each containing 40,000  $CO_2$  molecules.

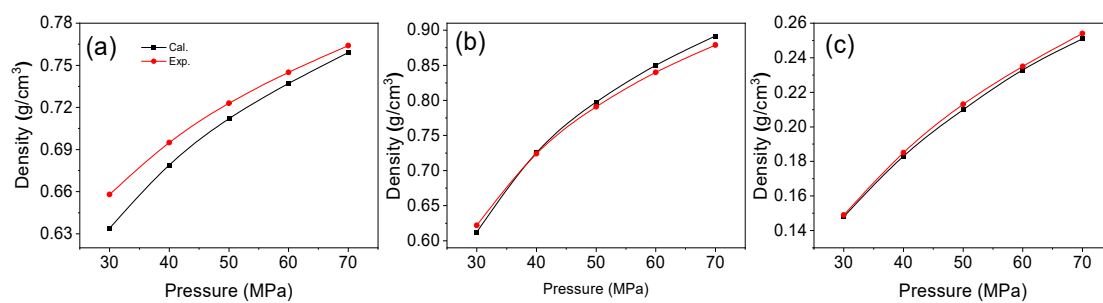

**Fig. S3** Comparison between simulated densities and experimental data <sup>5-7</sup>: (a) H<sub>2</sub>S, (b) CO<sub>2</sub>, and (c) CH<sub>4</sub>.

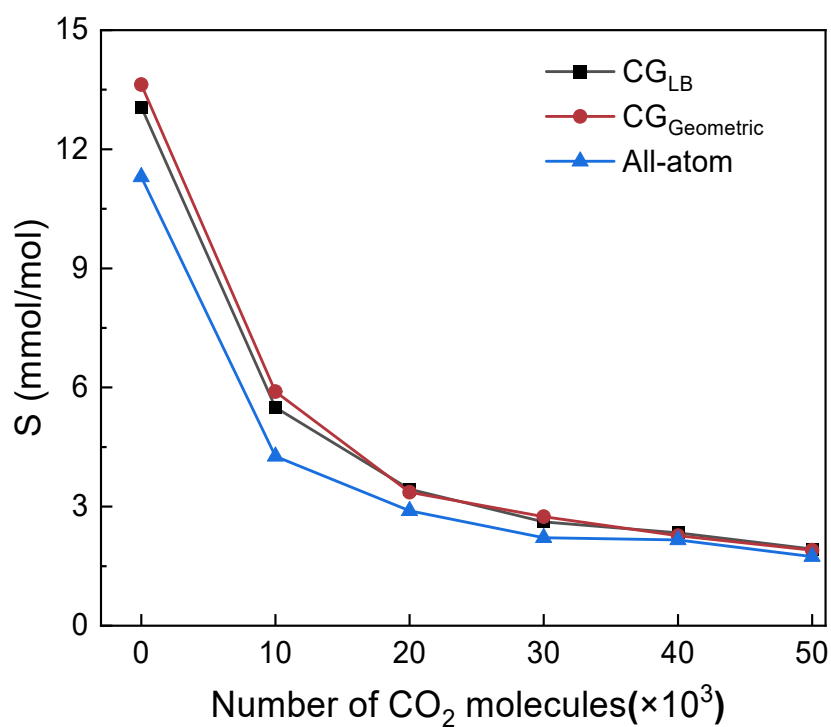

**Fig. S4** Solubility of S<sub>8</sub> (S, mmol/mol) in the binary H<sub>2</sub>S–CO<sub>2</sub> system as a function of the number of CO<sub>2</sub> molecules, calculated using a coarse-grained force field with the Lorentz–Berthelot (CG<sub>LB</sub>) mixing rule, a coarse-grained force field with the geometric mixing rule (CG<sub>Geometric</sub>), and an all-atom force field. All calculations were performed at T = 393 K and P = 40 MPa.

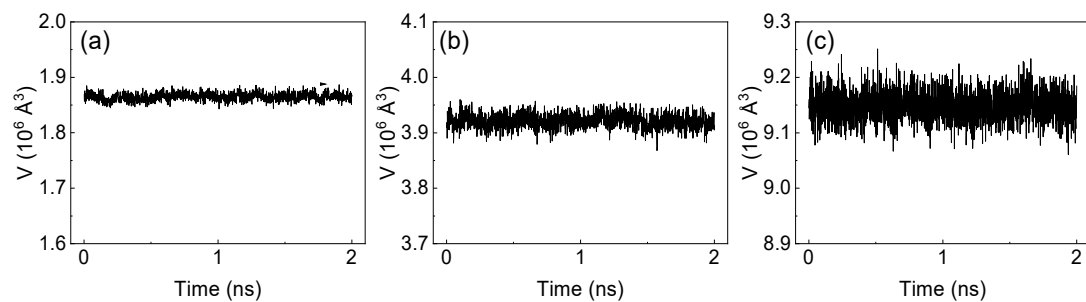

**Fig. S5** Time evolution of the simulation cell volume during the 2 ns production stage for (a) unary  $\text{H}_2\text{S}$ , (b) binary  $\text{H}_2\text{S}-\text{CO}_2$ , and (c) ternary  $\text{H}_2\text{S}-\text{CO}_2-\text{CH}_4$  systems at 393 K and 40 MPa.

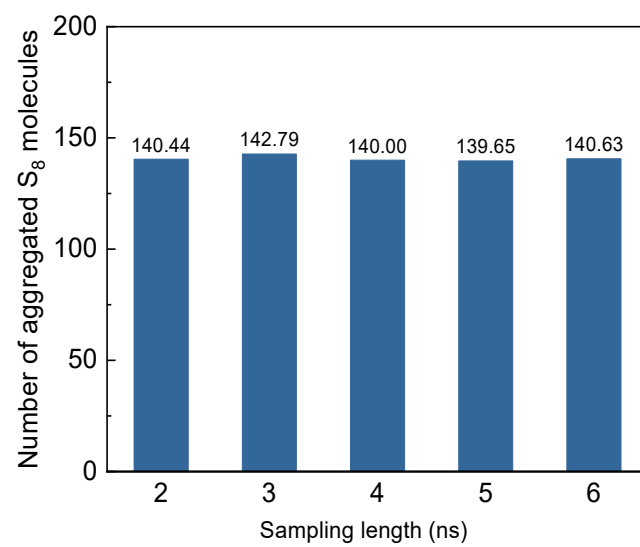

**Fig. S6** Number of S<sub>8</sub> clusters obtained using different sampling durations.

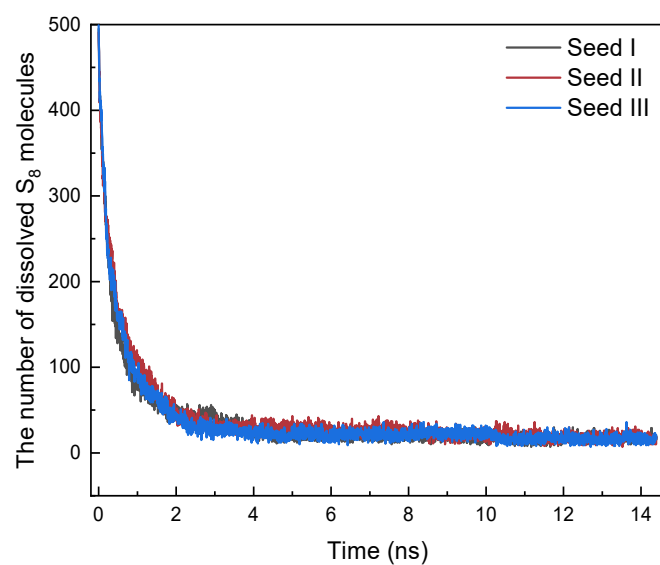

**Fig. S7** Temporal evolution of  $S_8$  aggregate population during the production run, showing stable fluctuations.



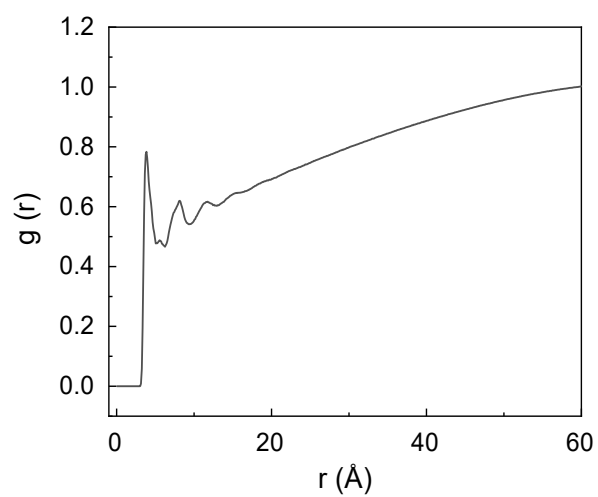

**Fig. S8** PRDF between  $\text{S}_8$  and  $\text{H}_2\text{S}$  in the binary  $\text{H}_2\text{S}-\text{CO}_2$  system.

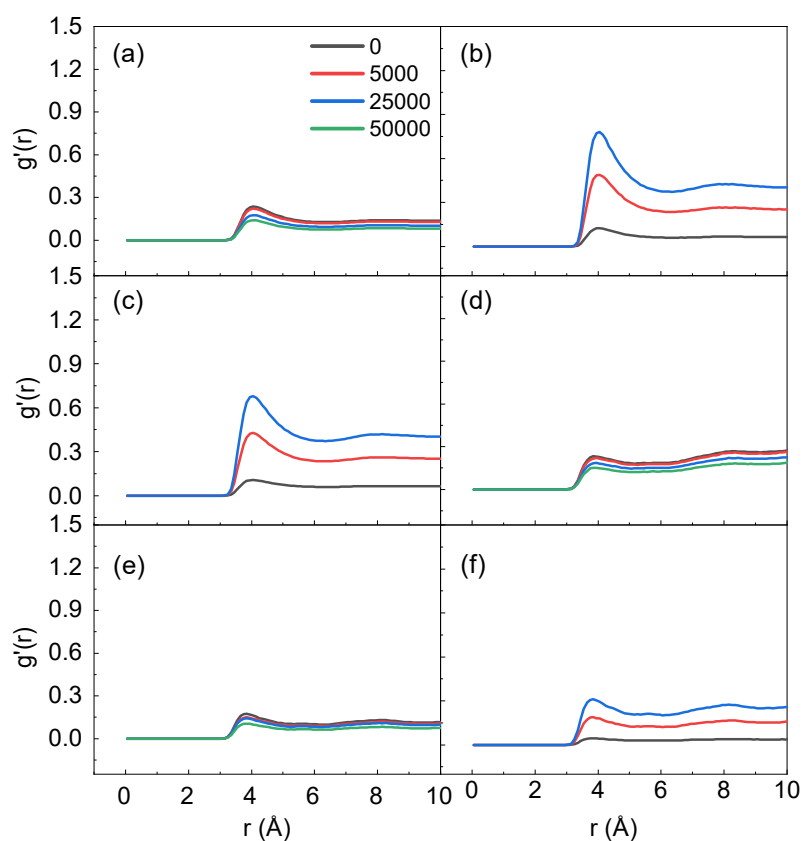

**Fig. S9** Corrected pair radial distribution functions  $g'(r)$  in the  $\text{H}_2\text{S}/\text{CH}_4 = 1:6$  system for different  $\text{CO}_2$  concentrations (0, 5,000; 25,000; 50,000 molecules), showing the spatial distribution evolution of  $\text{CH}_4\text{--H}_2\text{S}$  (a),  $\text{CH}_4\text{--CO}_2$  (b),  $\text{H}_2\text{S--CO}_2$  (c),  $\text{S}_8\text{--CH}_4$  (d),  $\text{S}_8\text{--H}_2\text{S}$  (e), and  $\text{S}_8\text{--CO}_2$  (f) molecular pairs.

## Supplementary References

1. G. Galliero, C. Nieto-Draghi, C. Boned, J. B. Avalos, A. D. Mackie, A. Baylaucq and F. Montel, *Ind. Eng. Chem. Res.*, 2007, **46**, 5238-5244.
2. M. G. Martin and J. I. Siepmann, *J. Phys. Chem. B*, 1998, **102**, 2569-2577.
3. R. Hens and T. J. H. Vlugt, *J. Chem. Eng. Data*, 2018, **63**, 1096–1102.
4. R. T. Cygan, V. N. Romanov and E. M. Myshakin, *J. Phys. Chem. C*, 2012, 116, 13079–13091.
5. E. W. Lemmon and R. Span, *J. Chem. Eng. Data*, 2006, **51**, 785-850.
6. A. Laesecke and C. D. Muzny, *J. Phys. Chem.*, 2017, **46**, 013107.
7. U. Setzmann and W. Wagner, *J. Phys. Chem.*, 1991, **20**, 1061-1155.
